# Supplementary material for: Circularly polarized luminescence on dinuclear Tb(iii) and Eu(iii) complexes with (S-) and (R-) 2-phenylpropionate
Source: Royal Society of Chemistry journal article supplement (doi:10.1039/c6dt04686j), 2017-01-01
Supplement: c6dt04686j1.pdf [file c6dt04686j1.pdf]

## Supporting Information for “Circularly Polarized Luminescence on dinuclear Tb(III) and Eu(III) complexes with (S-) and (R-) 2-Phenylpropionate”

Berta Casanovas, Francesco Zinna, Lorenzo Di Bari,\* Mohamed Salah El Fallah, Mercè Font-Bardía and Ramon Vicente\*

### CPL spectra

The samples were excited with a UV-B fluorescent lamp ( $\lambda_{\text{max}} = 365 \text{ nm}$ ) with a  $90^\circ$  degree geometry. The spectra were recorded on a quartz plate deposition prepared from a  $\text{CH}_3\text{CN}$  suspension. At least two different depositions for each enantiomer were measured to check the reproducibility of the measurements. In order to rule out the occurrence of contributions from linear luminescence anisotropy, the sample was rotated by  $90^\circ$ ,  $180^\circ$ ,  $270^\circ$  and then flipped around its  $C_2$  axis in order to measure both the faces of the deposition. A spectrum was recorded after each rotation to check that no significant difference depending on the rotation angle was present.

Solution spectra were measured on a  $10^{-3} \text{ M}$   $\text{CH}_2\text{Cl}_2$  solution.

### ECD spectra

ECD spectra were recorded with a Jasco J-710 spectropolarimeter on the same samples used for CPL measurements. In order to rule out the occurrence of contributions from linear dichroism/linear birefringence, the sample was rotated as described above for CPL spectra.

### Luminescence spectra

The comparison between the excitation/emission spectra in powder solid and in  $\text{CH}_3\text{CN}$  suspension was performed with a iHR 320 Horiba Jobin Yvon spectrometer.

### NMR spectra

NMR were performed with a Varian spectrometer operating at 600 MHz for  $^1\text{H}$ . Temperature was set to  $25.0 \pm 0.1 \text{ }^\circ\text{C}$ . The spectra were measured in  $\text{CDCl}_3$ .

---

**Table S1.** Selected bonds (Å) for the complexes *S/R-1 - S/R-2*

---

|  | <i>S-1</i> | <i>S-2</i> | <i>R-1</i> | <i>R-2</i> |
|--|------------|------------|------------|------------|
|--|------------|------------|------------|------------|

|                    |          |          |          |           |
|--------------------|----------|----------|----------|-----------|
| <b>Ln1B-O1B</b>    | 2.328(4) | 2.353(3) | 2.328(4) | 2.352(3)  |
| <b>Ln1B-O3B</b>    | 2.534(4) | 2.556(3) | 2.534(4) | 2.564(3)  |
| <b>Ln1B-O4B</b>    | 2.476(4) | 2.492(3) | 2.470(4) | 2.510(3)  |
| <b>Ln1B-O5B</b>    | 2.329(4) | 2.337(3) | 2.325(4) | 2.357(3)  |
| <b>Ln1B-O7B</b>    | 2.344(4) | 2.383(3) | 2.348(4) | 2.377(3)  |
| <b>Ln1B-N1B</b>    | 2.596(5) | 2.505(3) | 2.496(4) | 2.525(3)  |
| <b>Ln1B-N2B</b>    | 2.603(5) | 2.461(3) | 2.432(4) | 2.470(3)  |
| <b>Ln1B-O9B</b>    | 2.504(4) | 2.590(4) | 2.590(5) | 2.612(4)  |
| <b>Ln1B-O10B</b>   | 2.440(4) | 2.626(4) | 2.607(4) | 2.622(3)  |
| <b>Ln2B-O2B</b>    | 2.370(4) | 2.384(3) | 2.337(4) | 2.370(3)  |
| <b>Ln2B-O3B</b>    | 2.316(4) | 2.336(3) | 2.311(3) | 2.338(2)  |
| <b>Ln2B-O6B</b>    | 2.339(4) | 2.363(3) | 2.362(4) | 2.391(3)  |
| <b>Ln2B-O7B</b>    | 2.544(4) | 2.552(3) | 2.545(4) | 2.565(3)  |
| <b>Ln2B-O8B</b>    | 2.416(4) | 2.438(3) | 2.415(4) | 2.437(3)  |
| <b>Ln2B-O11B</b>   | 2.521(4) | 2.531(3) | 2.452(4) | 2.480(3)  |
| <b>Ln2B -O12B</b>  | 2.451(4) | 2.490(3) | 2.517(4) | 2.545(3)  |
| <b>Ln2B-N3B</b>    | 2.579(5) | 2.601(4) | 2.560(4) | 2.593(3)  |
| <b>Ln2B -N4B</b>   | 2.561(5) | 2.586(4) | 2.575(4) | 2.606(3)  |
| <b>Ln1B...Ln2B</b> | 3.881    | 3.910    | 3.881    | 3.9077(7) |

**Table S2.** Hydrogen bonds and angles for the complexes *S/R-1* - *S/R-2*

|            |                       | d(OD -- H)(Å) | d(H.. OA)(Å) | d(OD .. OA)(Å) | Angle (°) |
|------------|-----------------------|---------------|--------------|----------------|-----------|
| <b>S-1</b> | O1L -- H1OL .. O9A    | 0.80(4)       | 1.81(4)      | 2.586(7)       | 166(6)    |
|            | O3L -- H3OL .. O11A   | 0.796         | 1.818        | 2.608          | 171.5     |
|            | O5L -- H5OL .. O9B_a  | 0.80(2)       | 1.816(14)    | 2.609(9)       | 172       |
|            | O5K -- H5OK .. O9B_a  | 0.797         | 1.878        | 2.632          | 172       |
|            | O7L -- H7OL .. O11B   | 0.800(9)      | 1.858(9)     | 2.658(6)       | 178.3(16) |
|            | O9L -- H9OL .. O12B   | 0.80(4)       | 1.84(4)      | 2.639(5)       | 173(6)    |
| <b>S-2</b> | O1L -- H1OL .. O9A_b  | 0.80(3)       | 1.82(3)      | 2.597(4)       | 163(3)    |
|            | O3L -- H3OL .. O11A   | 0.80(3)       | 1.85(3)      | 2.627(5)       | 166(4)    |
|            | O5L -- H5OL .. O9B    | 0.800(12)     | 1.819(8)     | 2.618(6)       | 176(12)   |
|            | O5K -- H5OK .. O9B    | 0.8           | 1.962        | 2.627          | 140.2     |
|            | O7L -- H7OL .. O11B   | 0.80(3)       | 1.89(4)      | 2.691(4)       | 177(5)    |
|            | O9L -- H9OL .. O12B_c | 0.80(3)       | 1.82(3)      | 2.609(4)       | 167(4)    |
| <b>R-1</b> | O1L -- H1OL .. O9A    | 0.81(7)       | 1.81(6)      | 2.607(7)       | 169(8)    |
|            | O3L -- H3OL .. O11A   | 0.80(4)       | 1.85(5)      | 2.591(7)       | 155(5)    |
|            | O5L -- H5OL .. O9B    | 0.80(3)       | 1.83(2)      | 2.624(9)       | 178       |
|            | O5K -- H5OK .. O10B   | 0.80(9)       | 1.85(7)      | 2.639(12)      | 168(16)   |
|            | O7L -- H7OL .. O11B   | 0.81(6)       | 1.86(6)      | 2.645(5)       | 165(5)    |
|            | O9L -- H9OL .. O12B_a | 0.81(8)       | 1.86(8)      | 2.663(7)       | 172(5)    |
| <b>R-2</b> | O1L -- H1OL .. O9A    | 0.82(3)       | 1.82(3)      | 2.615(5)       | 164(4)    |
|            | O3L -- H3OL .. O11A_d | 0.81(4)       | 1.81(3)      | 2.593(5)       | 166(5)    |
|            | O5L -- H5OL .. O9B    | 0.814(17)     | 1.808(14)    | 2.615(5)       | 171(9)    |
|            | O5K -- H5OK .. O10B   | 0.810         | 1.830        | 2.633          | 171       |
|            | O7L -- H7OL .. O11B   | 0.82(4)       | 1.82(4)      | 2.628(4)       | 169(4)    |

|                    |                     |         |         |          |        |
|--------------------|---------------------|---------|---------|----------|--------|
|                    | O9L -- H9OL .. O12B | 0.85(5) | 1.84(5) | 2.689(5) | 175(7) |
| a = 1-x,1/2+y,1-z  |                     |         |         |          |        |
| b = x,1+y,z        |                     |         |         |          |        |
| c = 1+x,y,z        |                     |         |         |          |        |
| d = 1-x,-1/2+y,1-z |                     |         |         |          |        |

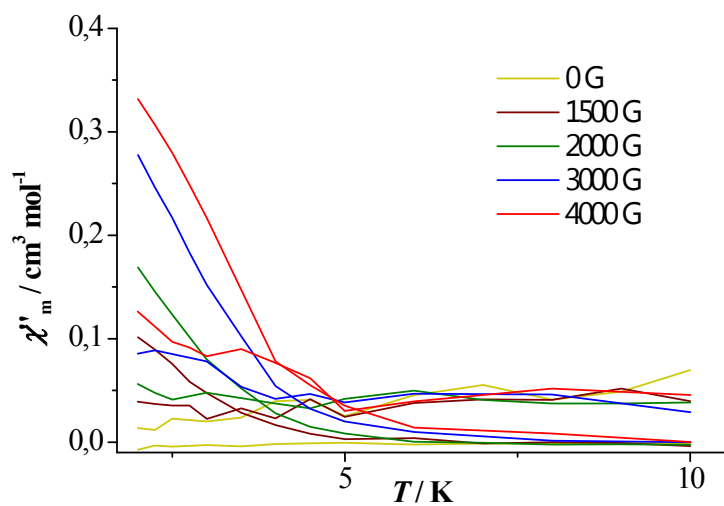

**Figure S1:** AC susceptibility measurements for **S-1**.

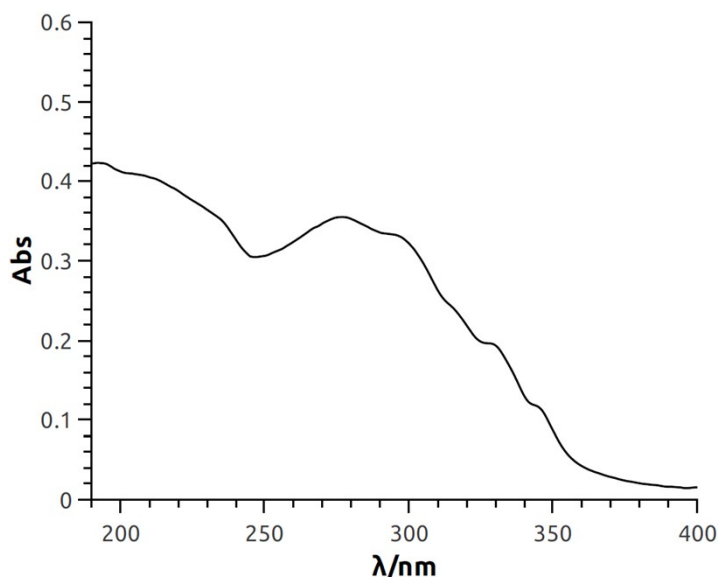

**Figure S2:** Solid state absorption spectrum of Tb complexes on a quartz plate deposition.

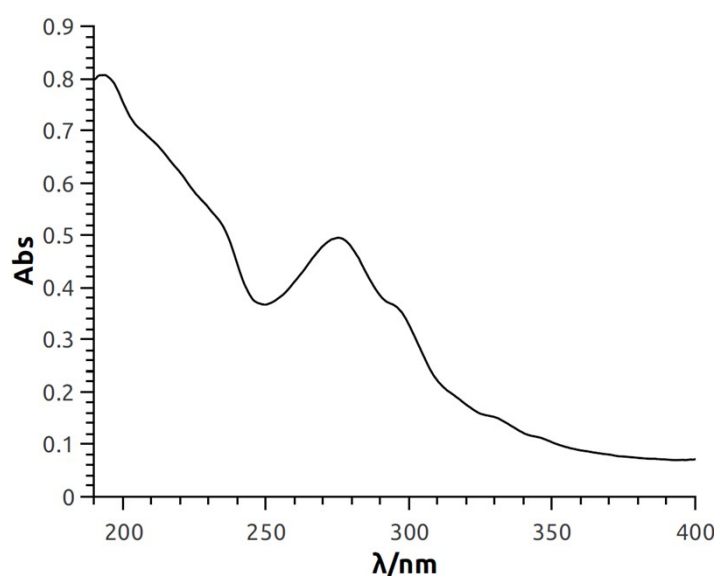

**Figure S3:** Solid state absorption spectrum of Eu complexes on a quartz plate deposition.

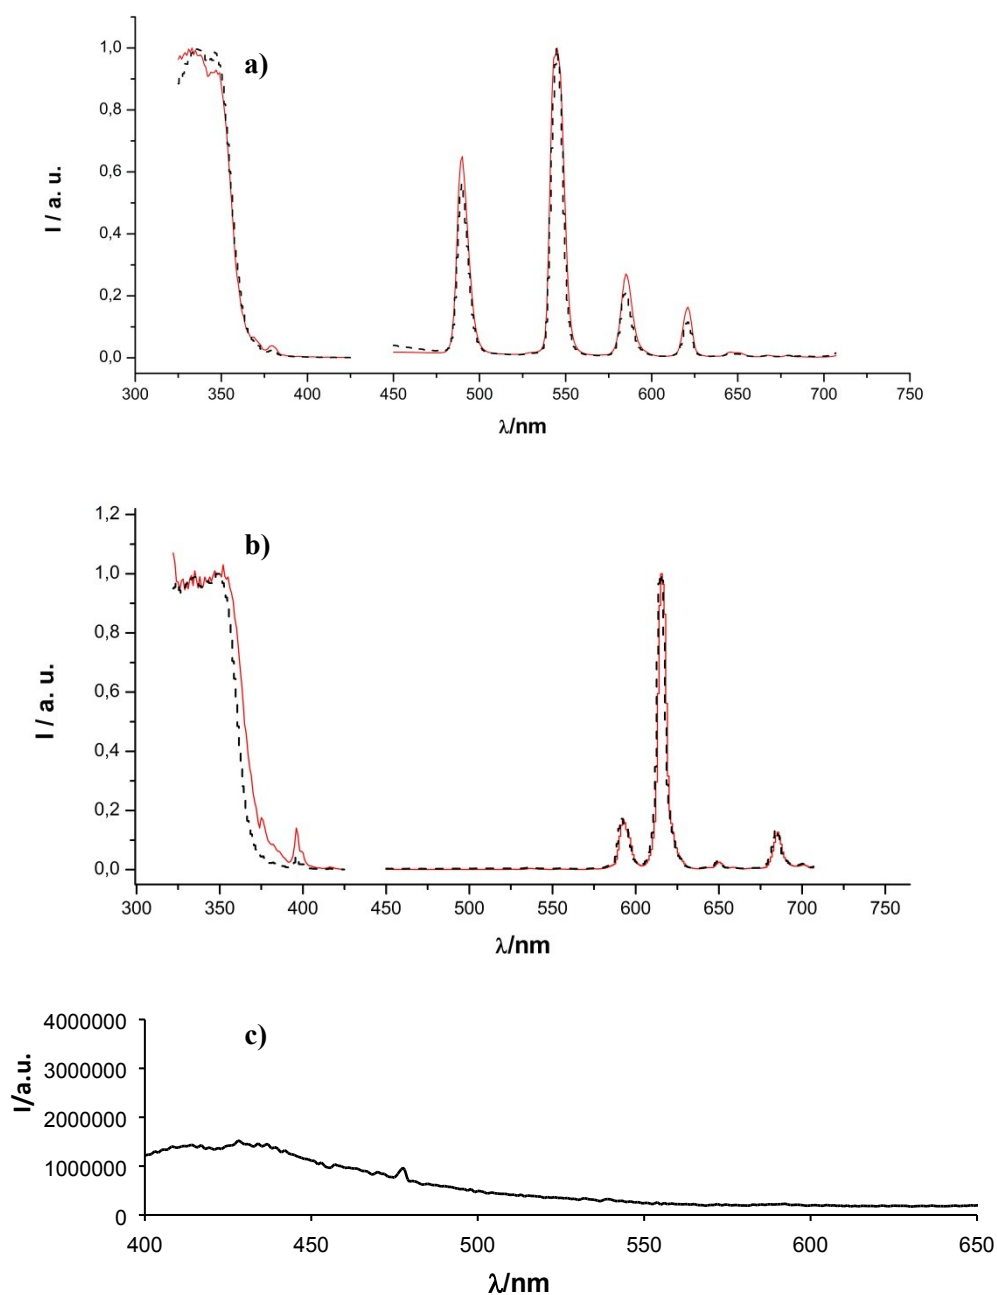

**Figure S4:** Excitation ( $\lambda_{em} = 545$  nm for **a** and 615 nm for **b**) and emission ( $\lambda_{ex} = 365$  nm) spectra of  $\text{CH}_3\text{CN}$  dispersions (dashed black lines) and full solid-state (powder sample, red lines) of **S-1** (a) and **S-2** (b). (c): solid-state emission spectrum ( $\lambda_{ex} = 365$  nm) of **phen** ligand.

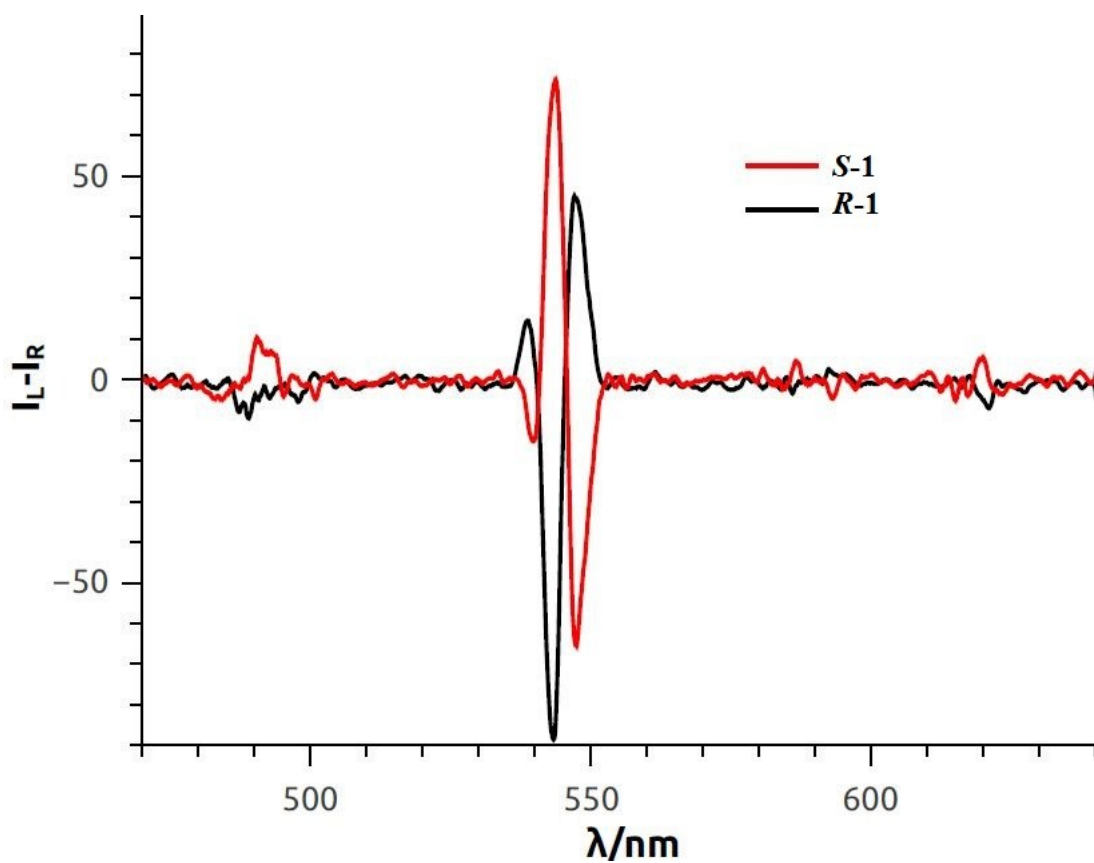

**Figure S5:** Solution (CH<sub>2</sub>Cl<sub>2</sub>) CPL spectra of *S-1*, *R-1* Tb complexes on a quartz plate deposition.

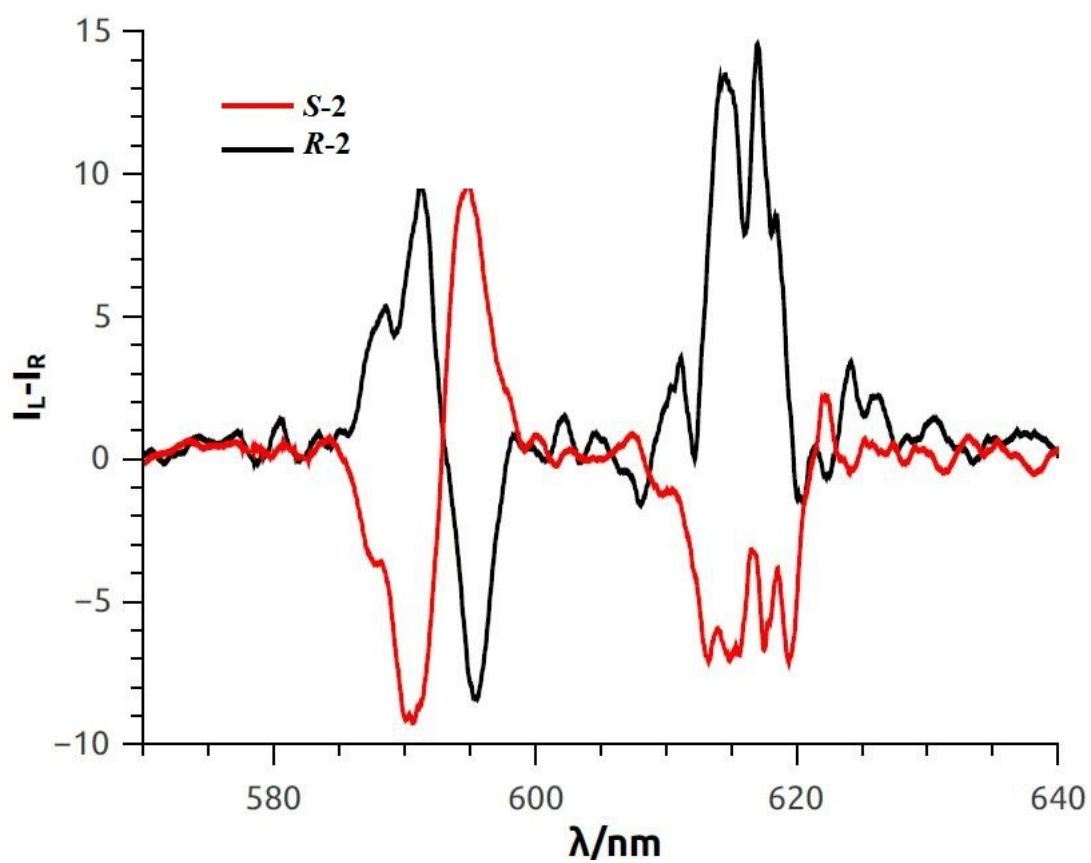

**Figure S6:** Solution (CH<sub>2</sub>Cl<sub>2</sub>) CPL spectra of *S-2* and *R-2* Eu complexes on a quartz plate deposition.

### NMR spectra

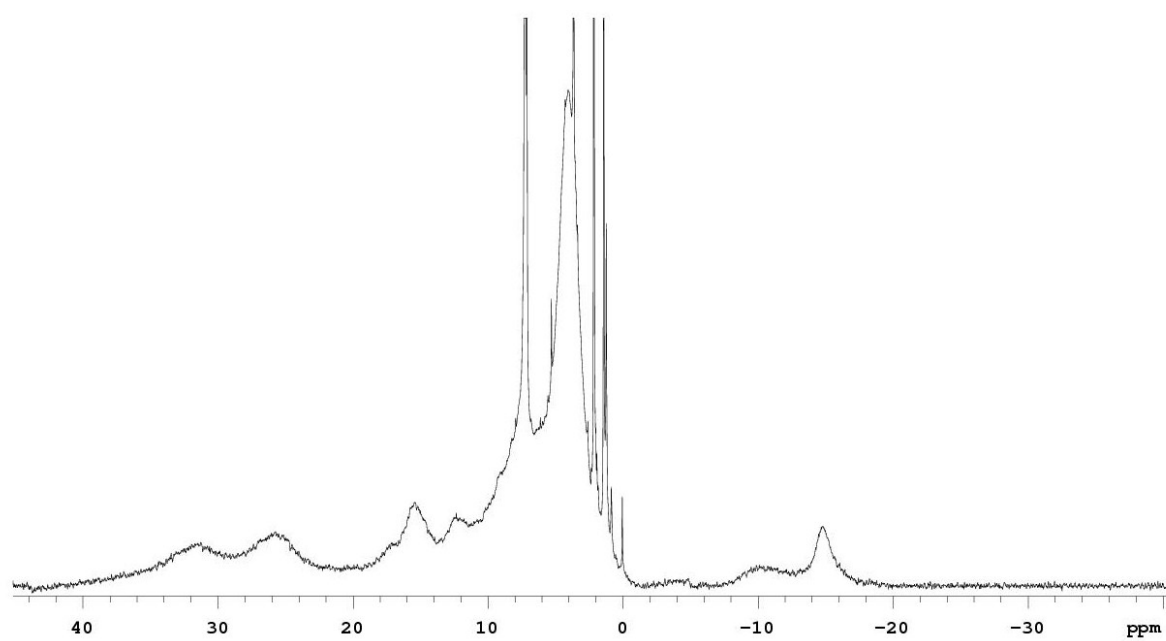

**Figure S7:**  $^1\text{H}$  NMR spectrum of **S-1** Tb complex ( $\text{CDCl}_3$ ).

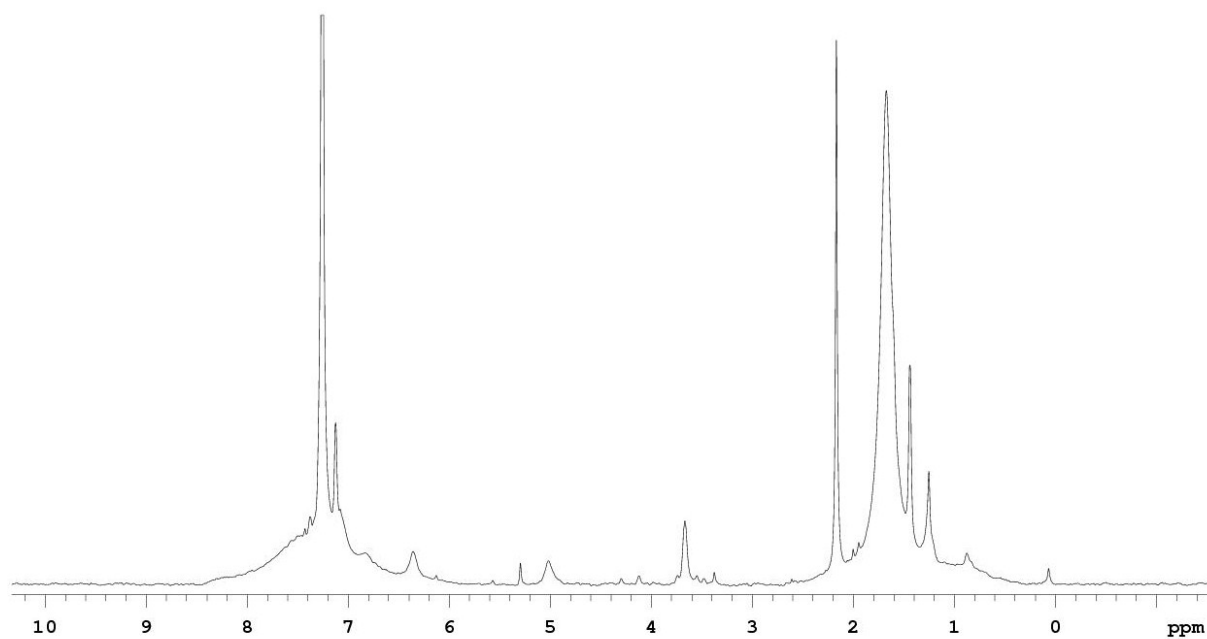

**Figure S8:**  $^1\text{H}$  NMR spectrum of **S-2** Eu complex ( $\text{CDCl}_3$ ).
